# Supplementary material
Source: Elsevier journal article supplement (http://raiithold.iith.ac.in/1124/1/mmc1.pdf)
Supplement: mmc1 [file mmc1.pdf]

**A novel 1,1'-bis[4-(5,6-dimethyl-1*H*-benzimidazole-1-yl)butyl]-4,4'-bipyridinium dibromide  
(viologen) for a high contrast electrochromic device**

**Supporting Information**

**General:** IR spectra were recorded on a Bruker Tensor 37 (FTIR) spectrophotometer. <sup>1</sup>H NMR spectra were recorded on a BrukerAvance 400 (400 MHz) spectrometer at 295 K in CDCl<sub>3</sub> or CD<sub>3</sub>OD; chemical shifts ( $\delta$  ppm) are reported in standard fashion with reference to either internal standard tetramethylsilane (TMS) ( $\delta_{\text{H}} = 0.00$  ppm) or CHCl<sub>3</sub> ( $\delta_{\text{H}} = 7.25$  ppm). <sup>13</sup>C NMR spectra were recorded on a BrukerAvance 400 (100 MHz) spectrometer at RT in CDCl<sub>3</sub> or CD<sub>3</sub>OD; chemical shifts ( $\delta$  ppm) are reported relative to CHCl<sub>3</sub> [ $\delta_{\text{C}} = 77.00$  ppm (central line of triplet)]. In the <sup>13</sup>C NMR, the nature of carbons (C, CH, CH<sub>2</sub> and CH<sub>3</sub>) was determined by recording the DEPT-135 spectra, and is given in parentheses and noted as s = singlet (for C), d = doublet (for CH), t = triplet (for CH<sub>2</sub>) and q = quartet (for CH<sub>3</sub>). In the <sup>1</sup>H-NMR, the following abbreviations were used throughout: s = singlet, d = doublet, t = triplet, q = quartet, qui = quintet, m = multiplet and br s. = broad singlet. The assignment of signals was confirmed by <sup>1</sup>H, <sup>13</sup>C CPD and DEPT spectra. High-resolution mass spectra (HR-MS) were recorded using Agilent6538 UHD Q-TOF using multimode source, JEOL instrument (EI and FAB) or a Bruker Apex Qe instrument (ESI) and HRMS (FT-ICR): Bruker Daltonic APEX 2 with electron spray ionization (ESI). Reactions were monitored by TLC on silica gel using a combination of petroleum ether and ethyl acetate and dichloromethane as eluents. Solvents were distilled prior to use; petroleum ether with a boiling range of 60 to 80 °C was used. Acme's silica gel (60 – 120 mesh) was used for column chromatography (approximately 20 g per one gram of crude material).

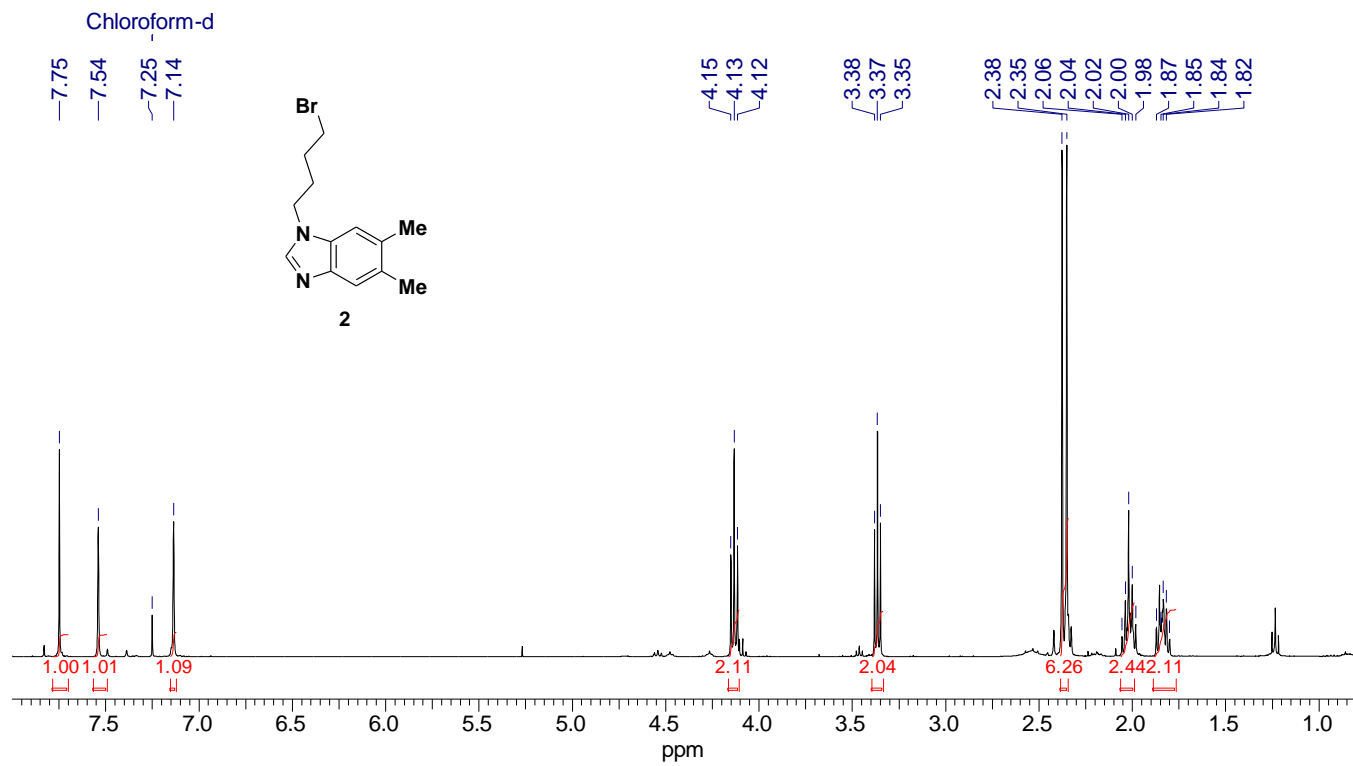

$^1\text{H}$  NMR (400 MHz) spectrum of **2** in  $\text{CDCl}_3$ .

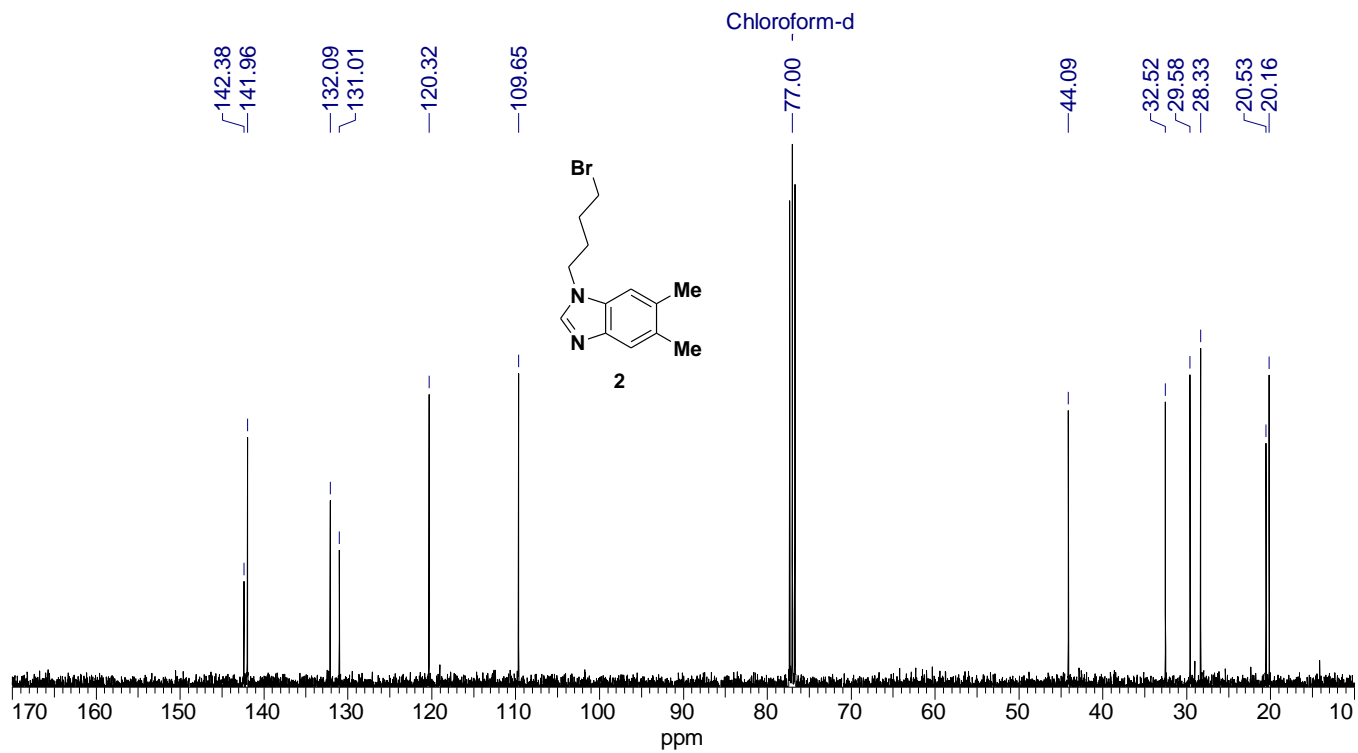

$^{13}\text{C}$  NMR (100 MHz) spectrum of **2** in  $\text{CDCl}_3$ .

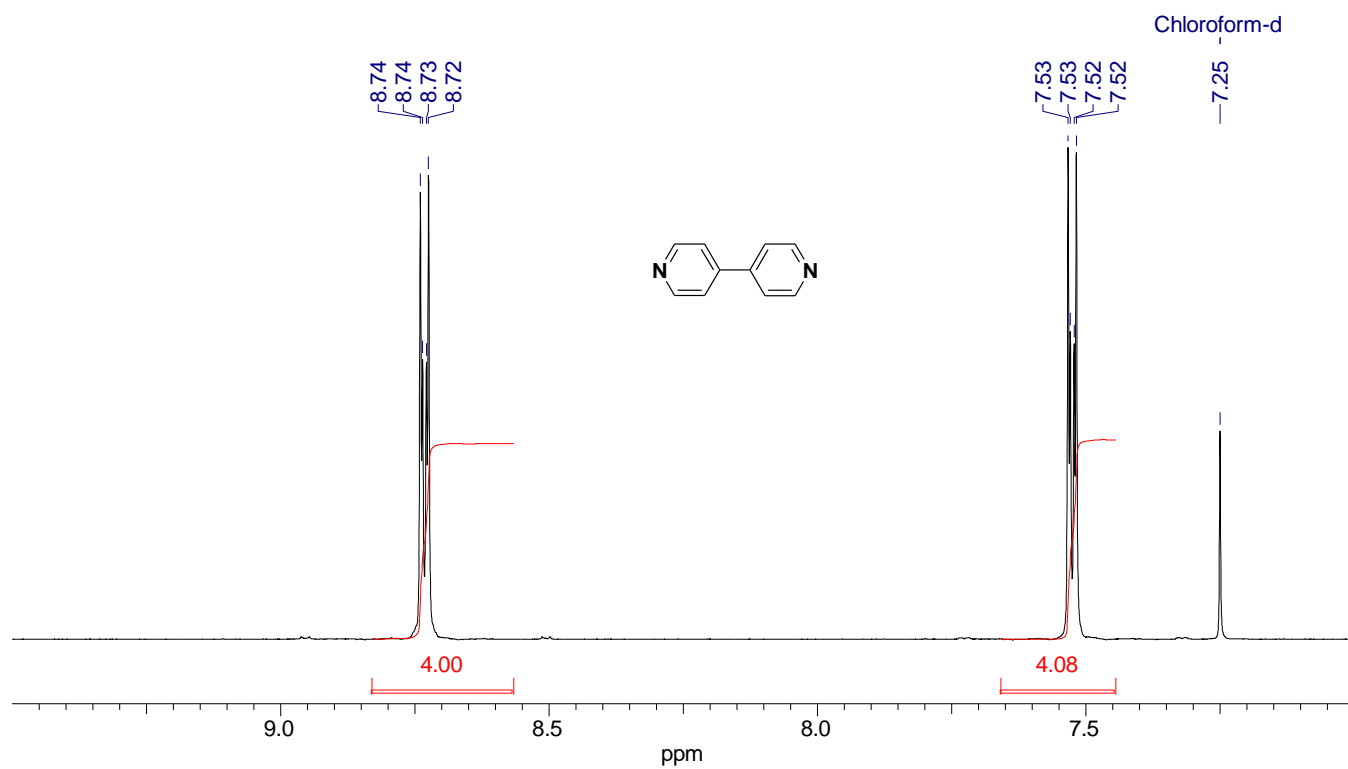

$^1\text{H}$  NMR (400 MHz) spectrum of 4,4'-bipyridyl in  $\text{CDCl}_3$ .

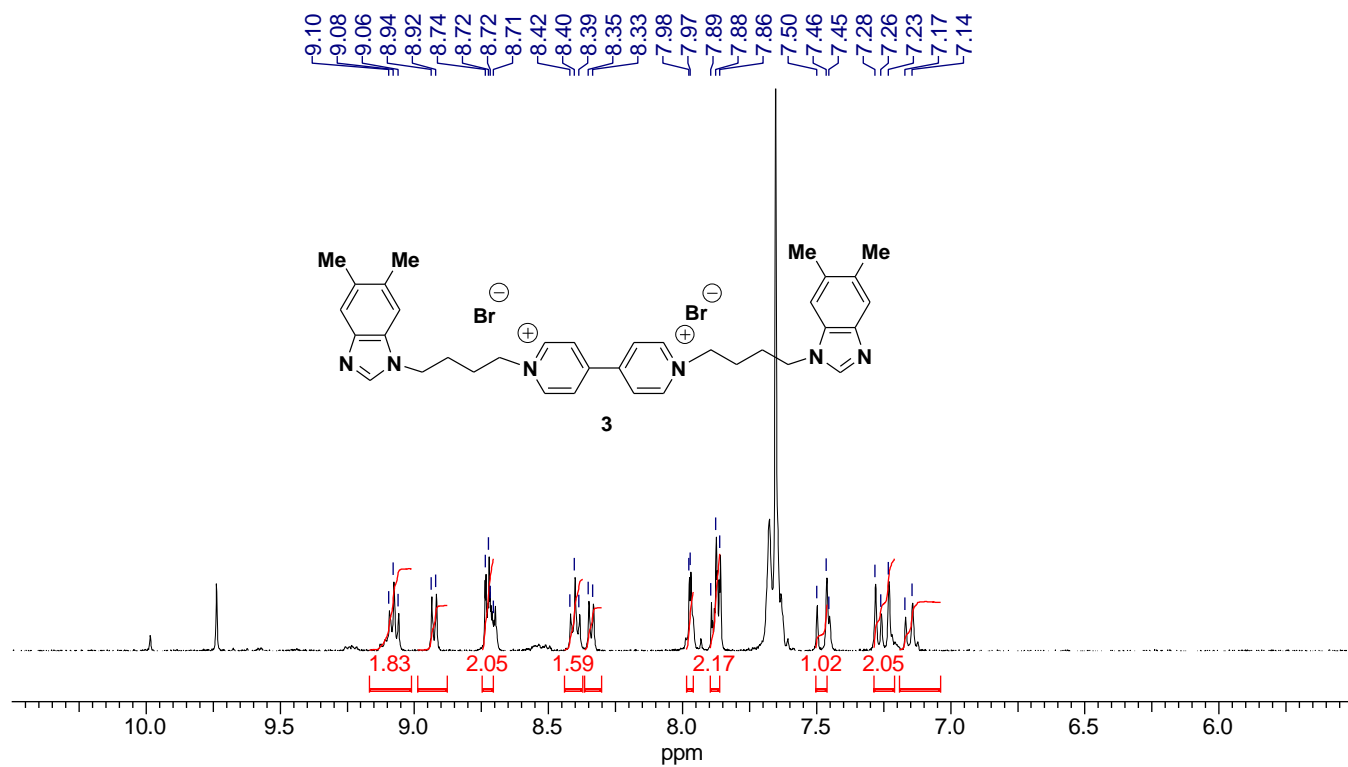

<sup>1</sup>H NMR (400 MHz) spectrum of **3** in CD<sub>3</sub>OD.

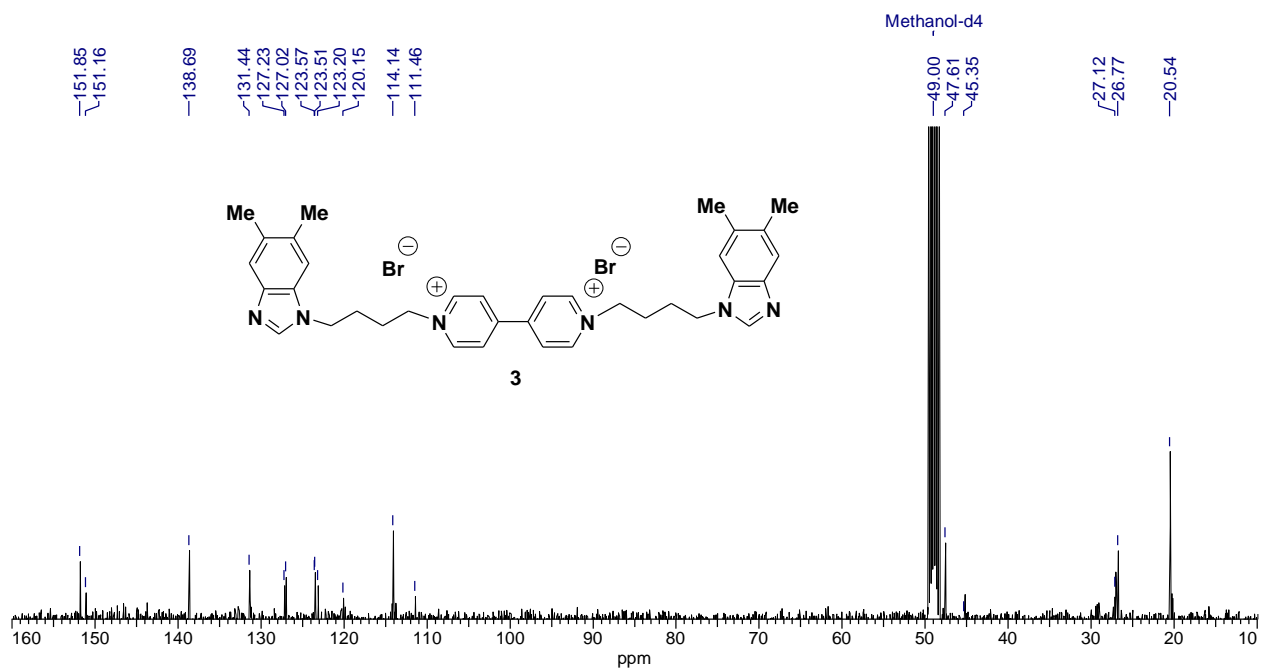

<sup>13</sup>C NMR (100 MHz) spectrum of **3** in CD<sub>3</sub>OD.
